# Supplementary material for: Structure and properties of chitosan/sodium dodecyl sulfate composite films
Source: Royal Society of Chemistry journal article supplement (doi:10.1039/d1ra08218c), 2022-01-01
Supplement: d1ra08218c1.pdf [file d1ra08218c1.pdf]

## Supplementary Information

### Structure and properties of chitosan/sodium dodecyl sulfate composite films

Song Jiang, Congde Qiao\*, Xujie Wang, Zhongwei Li\* and Guihua Yang

*School of Materials Science and Engineering, State Key Laboratory of Biobased Material and  
Green Papermaking, Qilu University of Technology (Shandong Academy of Sciences), Jinan  
250353, PR China*

Table S1 The weight loss of composite films with various SDS concentrations at  
different stage.

| Weight loss(%) at<br>different temperature | 140 °C  | 200 °C  | 300 °C  | 600 °C  |
|--------------------------------------------|---------|---------|---------|---------|
| Blank                                      | 18.1383 | 23.6064 | 51.8562 | 68.2447 |
| 4%                                         | 6.4793  | 7.8142  | 57.5293 | 64.4812 |
| 8%                                         | 6.1744  | 7.5111  | 57.2501 | 63.9344 |
| 16%                                        | 4.2294  | 5.6831  | 52.1126 | 57.8248 |

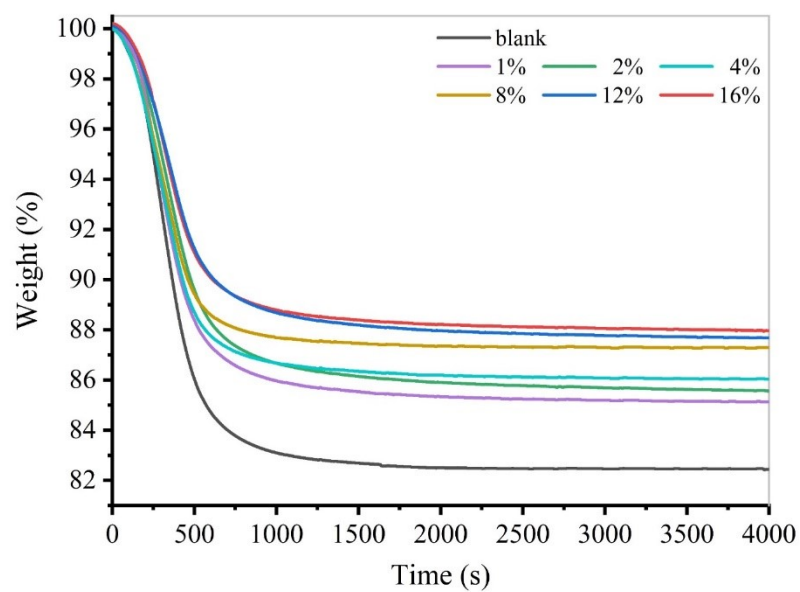

19

20 Figure S1. Water content of the composite films with various SDS concentrations (Measured at a

21 constant temperature of 120°C using a thermogravimetric analyzer).

22

23

24

25

26

27

28

29

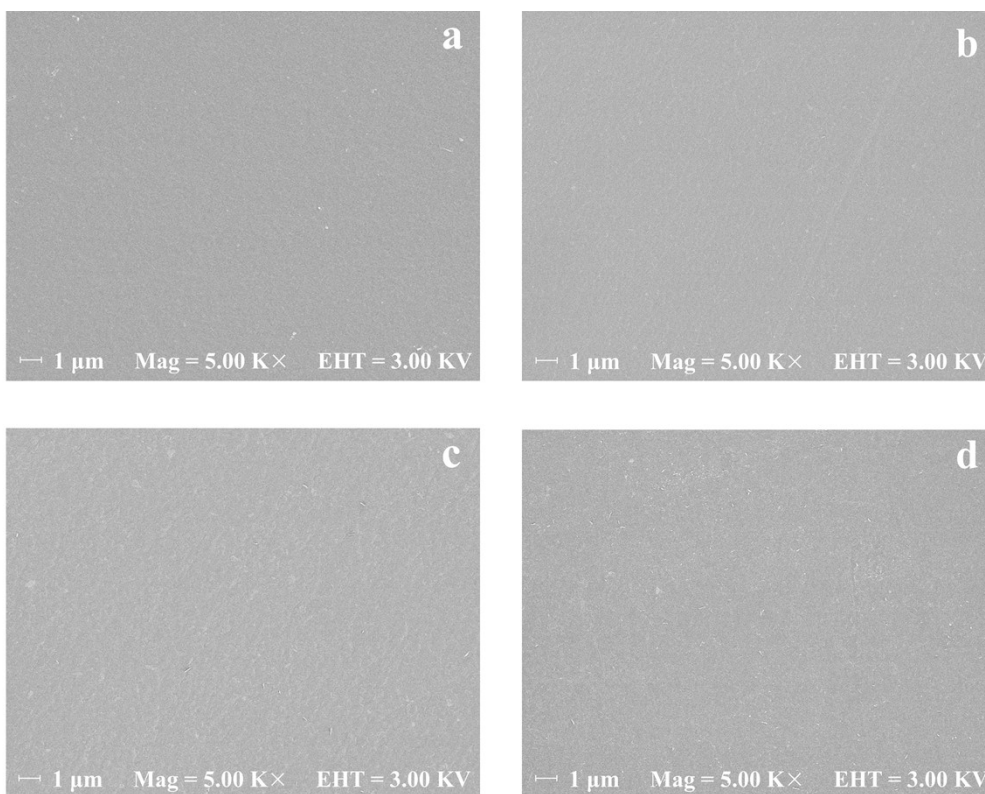

30

31

32 Figure S2. SEM images of composite films with various SDS concentrations (a: blank; b: 4%; c:

33 8%; d: 16%).

34

35

36

37

38

39

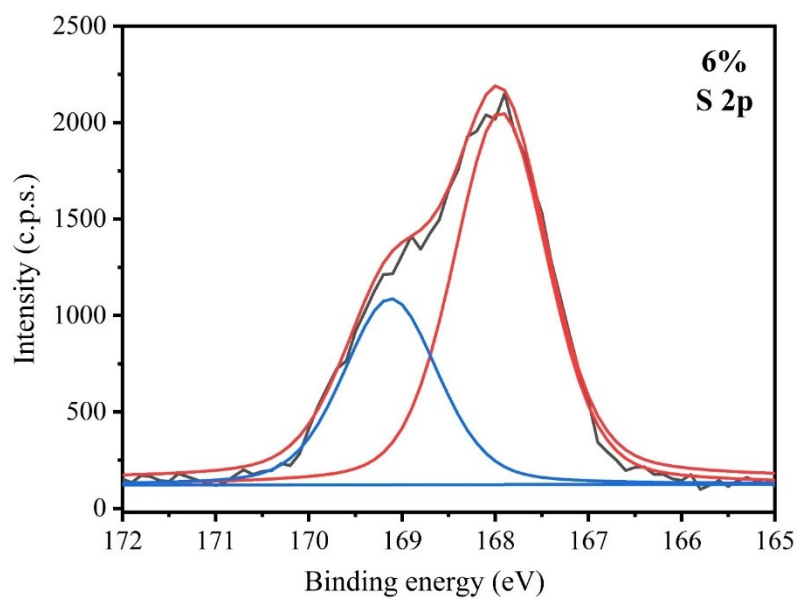

Figure S3. High resolution XPS spectra of S element for sample 6%.

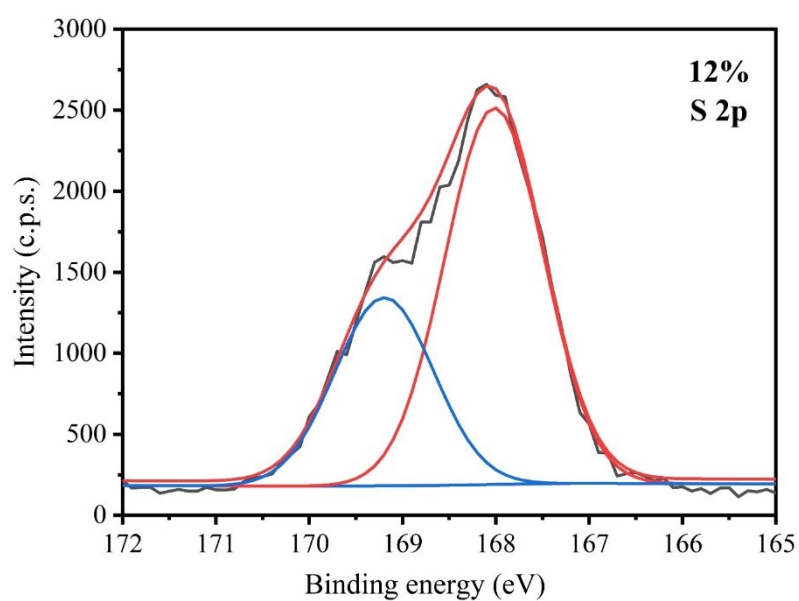

Figure S4. High resolution XPS spectra of S element for sample 12%.

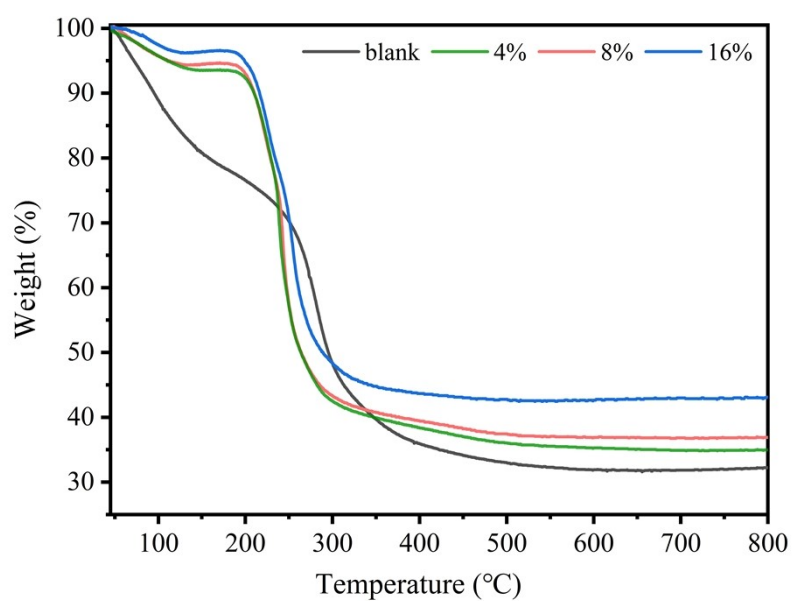

49

50 Figure S5. Thermal performance characterization of composite films with various SDS

51 concentrations.

52

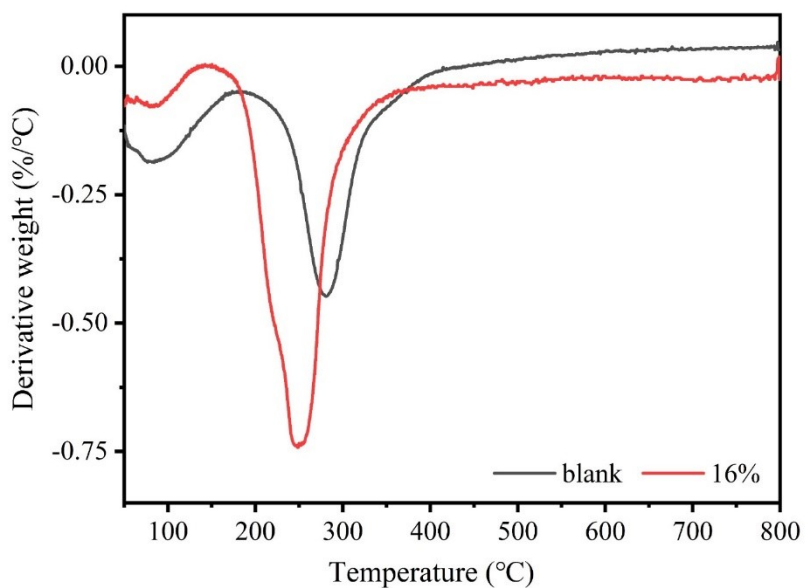

53

54 Figure S6. The DTG thermograms of pure chitosan and composite film.

55

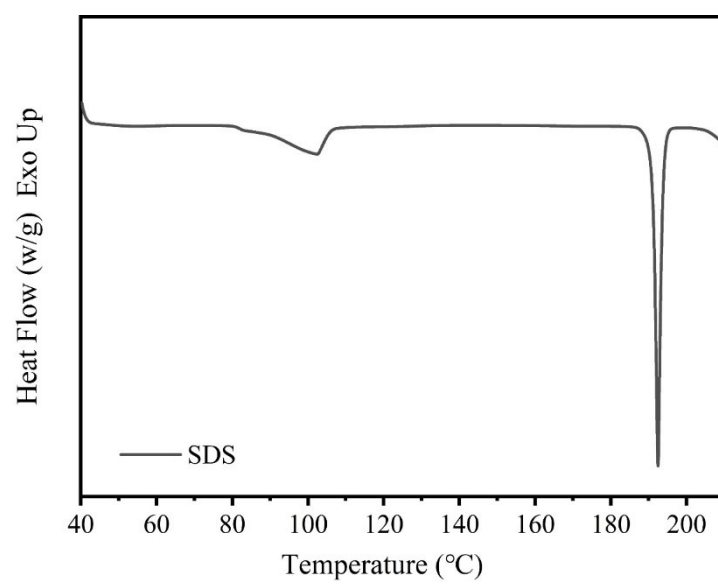

Figure S7. DSC thermograms of pure SDS
